# Supplementary material for: Preparation of sulfur-doped carbon quantum dots from lignin as a sensor to detect Sudan I in an acidic environment
Source: Royal Society of Chemistry journal article supplement (doi:10.1039/d0tb00125b), 2020-01-01
Supplement: d0tb00125b1.pdf [file d0tb00125b1.pdf]

## Appendix A: Supplementary data

### Preparation of sulfur doped carbon quantum dots from lignin as sensor to detect Sudan I in acidic environment

Xiaoxu Yang,<sup>a</sup> Yanzhu Guo,<sup>a,b,\*</sup> Shuang Liang,<sup>a</sup> Shiyao Hou,<sup>a</sup> Tingting Chu,<sup>a</sup>

Jiliang Ma,<sup>a,\*</sup> Xiaohong Chen,<sup>a</sup> Jinghui Zhou,<sup>a</sup> and Runcang Sun<sup>a</sup>

<sup>a</sup> Liaoning Key Laboratory of Pulp and Paper Engineering, Dalian Polytechnic University,  
Dalian, 116034, China;

<sup>b</sup> State Key Laboratory of Pulp and Paper Engineering, South China University of  
Technology, Guangzhou, 510640, China

\*Corresponding authors' E-mail: guoyz@dlpu.edu.cn (Yanzhu Guo); jlma@dlpu.edu.cn  
(Jiliang Ma); Tel: +86-15164033963 (Yanzhu Guo)

**Table S1** Comparison of the presented system with other reported methods for detection of

| Sudan I |                     |                                |                              |                       |                  |           |
|---------|---------------------|--------------------------------|------------------------------|-----------------------|------------------|-----------|
| Method  | Detection material  | Linear range ( $\mu\text{M}$ ) | $K_{SV}$ ( $\text{M}^{-1}$ ) | LOD ( $\mu\text{M}$ ) | Detection medium | Ref.      |
| GC-MS   | -                   | 0.02-0.098                     | -                            | 0.066                 | -                | [12]      |
| IAC     | -                   | 0.41-20.1                      | 16762                        | 0.23                  | methanol         | [13]      |
| HPLC    | -                   | -                              | -                            | 0.34                  | dichloromethane  | [14]      |
| PL      | copper nanoclusters | 0.1-30                         | -                            | 0.065                 | chloroform       | [16]      |
| PL      | Mn-ZnS QDs          | 0.2-7.41                       | 56900                        | 0.099                 | cyclohexane      | [17]      |
| PL      | CQDs                | 2.4-104.0                      | 13400                        | 0.95                  | pH=6.09          | [18]      |
| PL      | SCQDs               | 0-40                           | 30810                        | 0.12                  | pH=4.0           | This work |

12 C. Long, Z. Mai, X. Yang, B. Zhu, X. Xu, X. Huang and X. Zou, *Food Chem.*, 2011, **126**, 1324-1329.

13 L. He, Y. Su, B. Fang, X. Shen, Z. Zeng and Y. Liu, *Anal. Chim. Acta*, 2007, **594**, 139-146.

14 Y. Li, Y. Wang, H. Yang, Y. Gao, H. Zhao and A. Deng, *J. Chromatogr. A*, 2010, **1217**, 7840-7847.

16 S. Huang, L. Yang, N. Li and H. Luo, *Biosens. Bioelectron.*, 2013, **42**, 136-140.

17 N. Chen, H. Li, Z. Gao, F. Qu, N. Li and H. Luo, *Sensor. Actuat. B-Chem.*, 2014, **193**, 730-736.

18 A. R. Jose, U. Sivasankaran, S. Menon and K. G. Kumar, *Anal. Methods*, 2016, **8**, 5701-5706.

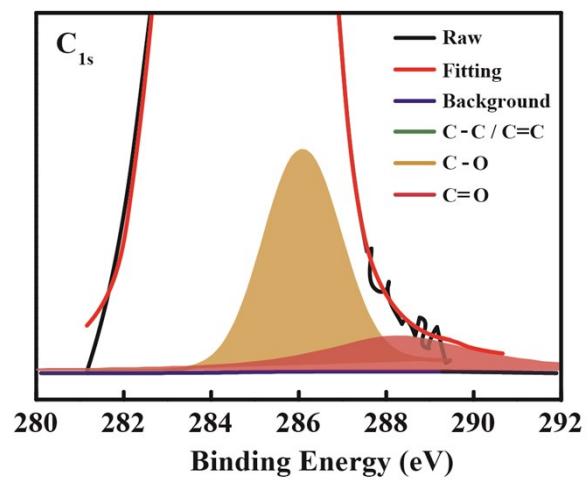

**Fig. S1** The local enlarged  $C_{1s}$  high-resolution spectrum of PHL.
